1 Article

# 2 Which are the central aspects of infant sleep? The 3 dynamic of sleep composites across infancy

4 Sarah F. Schoch<sup>1,2</sup>, Reto Huber<sup>3,4</sup>, Malcolm Kohler<sup>1</sup>, Salome Kurth<sup>1,5\*</sup>

5 <sup>1</sup> Department of Pulmonology, University Hospital Zurich, Zurich, CH; [sarah.schoch@usz.ch](mailto:sarah.schoch@usz.ch);

6 [Malcolm.kohler@usz.ch](mailto:Malcolm.kohler@usz.ch)

7 <sup>2</sup> University of Zurich, Zurich, CH;

8 <sup>3</sup> Child Development Center, University Children's Hospital Zurich, Zurich, CH; [reto.huber@kispi.uzh.ch](mailto:reto.huber@kispi.uzh.ch)

9 <sup>4</sup> Department of Child and Adolescent Psychiatry and Psychotherapy, Psychiatric Hospital,

10 University of Zurich, CH;

11 <sup>5</sup> Department of Psychology, University of Fribourg, Fribourg, CH; [salome.kurth@unifr.ch](mailto:salome.kurth@unifr.ch)

12

13

14

15 \* Correspondence: [salome.kurth@unifr.ch](mailto:salome.kurth@unifr.ch); Tel.: +41 (0)26 300 76 47

16 **Abstract:** Sleep is ubiquitous during infancy and important for the well-being of both infant and  
17 parent. Therefore, there is large interest to characterize infant sleep with reliable tools, for example  
18 by means of combining actigraphy with 24-h-diaries. However, it is critical to select the right  
19 variables to characterize sleep. With a principal component analysis, we identified 5 underlying  
20 sleep composites from 48 commonly used sleep variables: *Sleep Night*, *Sleep Day*, *Sleep Activity*, *Sleep*  
21 *Timing and Sleep Variability*. These composites accurately reflect the known changes of sleep  
22 throughout infancy as *Sleep Day* (representing naps), *Sleep Activity* (representing sleep efficiency and  
23 consolidation) and *Sleep Variability* (representing day-to-day stability) decrease across infancy, while  
24 *Sleep Night* (representing nighttime sleep) slightly increases and *Sleep Timing* becomes earlier with  
25 increasing age. Additionally, we uncover interesting dynamics between the sleep composites and  
26 demonstrate that infant sleep is not only highly variable between infants but also considerably  
27 dynamic within infants across time. Interestingly, *Sleep Day* is associated with behavioral  
28 development and therefore a potential marker for maturation. We recommend the use of sleep  
29 composites or of those specific single variables, which are solid representatives of the sleep  
30 composites for more reliable research.

31 **Keywords:** actimetry; sleep assessment; maturation; sleep variables; variable selection

32

---

## 33 1. Introduction

34 Why is sleeping the most common behavior of an infant in its first year of life [1]? Sleep fulfills an  
35 important function in development as the neurophysiology of sleep is linked to brain maturation,  
36 neural reorganization [2–4] as well as processes of learning and memory [5,6] [for an overview see 7].  
37 However, besides the vital importance of sleep for the child, it also affects the quality of infant-parent  
38 bonds, as early periods with infant sleep problems have been linked to parental depression and stress  
39 [8,9]. Supporting healthy infant sleep can thus improve the wellbeing of the whole family.

40 Sleep-wake patterns are extensively diversified across infants – and vary to a much greater extent  
41 compared to any other period in life [1]. This inter-individual variability confounds the establishment  
42 of normative age-specific sleep values. Additionally, sleep is not a one-dimensional construct, but  
43 characterized by numerous dimensions of quantity, quality, timing or consolidation. While sleep  
44 undergoes drastic changes across infancy, not all sleep dimensions evolve at the same time or to the  
45 same degree. Possibly most recognizable is the alteration from sleep being distributed throughout

46 the 24-hour-day (polyphasic sleep) to one primary sleep phase at nighttime (monophasic sleep) – a  
47 transition happening gradually from birth until about 5 years of age [1]. This transition involves a  
48 multitude of changes, as it affects not only the timing of sleep, but also its depth [10], and  
49 fragmentation [11]. Additionally, sleep quantity, measured as total sleep duration across 24 h, also  
50 decreases across the first year of life by ~8 minutes per month [12]. Notably, alongside the changes in  
51 sleep behavior, neurophysiology of sleep is reorganized and the composition of sleep states change  
52 across the first years of life: rapid eye movement (REM) sleep becomes less predominant and the  
53 electrophysiological characteristics typical for adult sleep (sleep spindles, slow waves) emerge  
54 [13,14].

55 Because of the ubiquity of sleep and its importance in early development, it is unsurprising that there  
56 is a large scientific interest in infant's sleep. Researchers use both subjective methods (questionnaires  
57 on status-quo sleep, most widely used are the Brief Infant Sleep Questionnaire [BISQ] and 24-h-sleep-  
58 wake-diaries [15]) and objective methods (actigraphy [16], videosomnography [17] and  
59 polysomnography [18]). Each method has advantages and disadvantages [19]. There is only moderate  
60 agreement among the diverse methods, with larger discrepancies between questionnaires vs.  
61 objective data than between 24-h-diaries vs. objective data [20,21]. Subjective methods are cost-  
62 effective and easy to administer to large populations. Yet, they are limited to items parents are aware  
63 of (e.g. sleep behavior but not sleep stages) and might be biased by parent's perception. Furthermore,  
64 the selection of assessment method largely depends on the research question and available resources.  
65 Objective methods reduce subjective bias and comprehensively represent the different dimensions of  
66 sleep. Over the past 25 years, the combination of actigraphy with 24-h-diaries has emerged as the  
67 preferred method for many infant sleep investigations [22]. The advantage is its combination of  
68 objective and subjective methods which allows for the quantification of sleep in large populations  
69 and in natural environments, while being cost-effective [22,23]. However, issues remain regarding  
70 the standardization of actigraphy, especially in infants and young children [22,24]. One matter of  
71 improvement is the standardized reporting of methodological specifics, which is fundamental to this  
72 approach [23]. However, a remaining issue lies in the operationalization of sleep to capture its  
73 multiple dimensions accurately.

74 One current issue in investigating infant sleep is the selection of sleep variables. On one hand, there  
75 are several possible sleep domains and thus numerous sleep variables that can be calculated. On the  
76 other hand, the computation of these sleep variables is not standardized. The current situation leaves  
77 researchers to decide which sleep variable and which computations to choose [22]. For example, sleep  
78 duration is one of the most investigated sleep behaviors in infancy (reported in 82% of studies [12]).  
79 However, reports are based on different concepts, such as sleep duration computed across night-time  
80 only, sleep duration including 24 hours, duration of sleep with a split of day/night at a chosen clock  
81 time, or with clock times for day/night split that are individually assigned for each infant. This  
82 divergence is problematic, because it prevents comparability across studies [25]. It is also a likely  
83 source for lacking reproducibility. Additionally, researchers might rely on default variables from an  
84 automated analysis program, which is dubious if the research question demands more specificity.  
85 Using a large number of sleep variables to address the dimensions of sleep will likely increase false  
86 positives due to multiple testing [26]. Therefore, one should aim for a reduction of methodological  
87 complexity.

88 A novel and promising approach to handle the complexity of sleep dimensions was recently  
89 presented. Based on data of young children, Staples et al. proposed "sleep composites" that were  
90 combined from multiple commonly-used sleep variables. This approach reduces the dependence on  
91 single (often overlapping) sleep variables and increases the measurement stability [27]. A total of 4  
92 sleep composites were discovered in both children and their mothers. These sleep composites contain  
93 the key dimensions of sleep; *Sleep Duration*, reflecting the quantity of sleep during the night; *Sleep*  
94 *Timing*, reflecting bedtimes and sleep onset times; *Sleep Variability*, reflecting day-to-day differences  
95 in sleep timing and duration; and *Sleep Activity*, reflecting movements and awakenings during the

96 night. They also found that daytime sleep and sleep latency were separate constructs to these four  
97 sleep composites (*i.e.* loaded on their own composite). The identified sleep composites revealed  
98 higher consistency across different assessment timepoints compared to single sleep variables. A  
99 higher consistency is important to anchor sleep behaviors as reference in certain age periods, which  
100 is crucial, for example, to unravel the influence of early sleep variables on later regulatory, cognitive  
101 or emotional outcomes.

102 The goal of this study was to extend the approach of Staples et al., to an infant dataset to facilitate  
103 variable selection for future sleep studies. We included 48 single sleep variables, which thoroughly  
104 characterize the diverse dimensions of sleep, and performed a component analysis to identify the  
105 core infant sleep composites. We then examined the evolution of the sleep composites across repeated  
106 assessments throughout the first year of life, and tested for sex differences in the sleep composites.  
107 Additionally, we explored the stability of composites as well as the stability of the single sleep  
108 variables. To evaluate the relevance of sleep for development and to identify maturational markers  
109 we linked sleep composites to infant behavioral developmental scores.

110

## 111 2. Materials and Methods

### 112 2.1 Participants

113 152 healthy infants (69 female) in Switzerland participated in a longitudinal study on infant sleep  
114 and behavioral development. Of these, a subsample of 50 infants has been included in a previous  
115 investigation [24]. Caregivers and participants were recruited through maternity wards, midwives,  
116 pediatricians, daycares, letters, social media, personal contacts and flyers distributed at universities,  
117 libraries, supermarkets, schools, family organizations and community centers. Participants were  
118 screened for study eligibility by means of an online questionnaire or telephone interview. Inclusion  
119 criteria for infants were good general health, being primarily breastfed at time of inclusion (*i.e.*,  
120 inclusion criterium of at least 50% of daily nutrition intake through breastfeeding at the first  
121 assessment at age 3 mo), vaginal birth (no cesarean section), and birth within 37-43 weeks of gestation.  
122 Parents were required to have good knowledge of German language.

123 Exclusion criteria for infants were disorders of the central nervous system, acute pediatric  
124 disorders, brain damage, chronic diseases as well as family background of narcolepsy, psychosis or  
125 bipolar disorder. Infants with birth weight below 2500 g, intake of medication affecting the sleep-  
126 wake cycle, or antibiotics prior to the first assessment were also excluded.

127 Ethical approval was obtained from the *cantonal ethics committee* (BASEC 2016-00730) and study  
128 procedures were consistent with the declaration of Helsinki. Written parental consent was obtained  
129 after explanation of the study protocol and before enrollment.  
130

### 131 2.2 Experimental design

132 We assessed 152 infants longitudinally at ages 3 mo, 6 mo and 12 mo. We scheduled assessments  
133 within a 1-month window around the target age, therefore actual age at start of assessment was  
134 between 2.43 – 3.39 mo, 5.42 – 6.28 mo and 11.47 – 12.26 mo.

135 We comprehensively quantified sleep-wake behavior for 11 continuous days. Ankle actigraphy  
136 and a 24-h-diary were simultaneously acquired during each of the three assessments, in alignment  
137 with our published recommendations for studying this age group [23]. GENEActiv movement  
138 sensors “actigraphs” (Activinsights Ltd, Kimbolton, UK, 43x40x13 mm, MEMS sensor, 16 g, 30 Hz  
139 Frequency recording resolution), which are sensitive for +/- 8 g range at 3.9 mg resolution, were  
140 attached to the infant’s left ankle in a modified sock (pocket sewn onto its side) or with a Tyvek paper  
141 strap. Parents were instructed to only remove the actigraph for bathing/swimming activities and to  
142 document any removal of the actigraph in the 24-h-diary. In the 24-h-diary (adapted from [21])

143 parents reported in 15-minute intervals about infant sleep and external movement occurring during  
144 infant sleep, e.g., sleeping in the parents arms, stroller, or baby sling etc. Further recorded parameters  
145 included feeding, crying episodes (> 15 minutes) and bed times (putting infant to bed in the evening  
146 and picking it up from the bed in the morning).

147 Additionally, in online questionnaires parents reported information on family background,  
148 health and demographics. Families received small gifts for their participation.

### 149 2.3 Behavioral development

150 Behavioral developmental status was assessed with the age-appropriate Ages and Stages  
151 questionnaire [28]. A *Collective Score*, represented by the sum of scores across five sub-domains  
152 (*Communication, Gross Motor, Fine Motor, Problem Solving* and *Personal Social*), was computed to  
153 quantify overall development. Additionally, we analyzed *Personal Social* and *Gross Motor*  
154 individually, because these subscales correlated with the well-validated testing battery Bayley Scales  
155 of Infant Development [29] and specifically also because these two sub-domains can indicate  
156 developmental delay [28,30]. Participants whose questionnaire was completed later than 1 week after  
157 the last day of the corresponding assessment were excluded from analysis, and missing data was  
158 imputed (section 2.4.2).

### 159 2.4 Sleep analysis

#### 160 2.4.1 Sleep–wake-behavior

161 Actigraph data was processed according to our standard protocols [24]. Binary data were  
162 extracted using GENEactiv PC Software (Version 3.1), imported into Matlab (R2016b) and converted  
163 to activity counts [31]. The latter included a 3-11 Hz bandpass filter and signal compression to 15 s  
164 bins. Acceleration data from the three movement axes was combined using sum of squares. The signal  
165 was then compiled to one data point per minute (analysis resolution). A published algorithm [32]  
166 was used to identify infant sleep and wake periods, and a 6-step modification [24] was applied to  
167 refine prediction for a better fit with the 24-h-diary. The first step of the modification (distinction  
168 between periods of high and low activity) was adjusted to use a threshold of 'mean activity \* 0.72'.  
169 Time periods without actigraphy information (*i.e.*, when the actigraph was not worn) were identified  
170 through the 24-h-diary or visual inspection (abrupt periods of no activity) and completed with  
171 information provided in the 24-h-diary.

#### 172 2.4.2 Handling of missing data

173 For some infants no sleep data was available for all timepoints: n = 2 at 3 mo (study enrollment  
174 at later age), n = 4 at 6 mo (n = 3 device failure, n = 1 parent withdrew from sleep assessment part of  
175 study) and n = 9 at 12 mo (n = 2 device failure, n = 3 participant attrition, n = 2 parent withdrew from  
176 sleep assessment part of study, n = 1 family moved away, n = 1 chronic sickness). Participants were  
177 instructed to collect actigraphy data for the duration of 11 continuous days (*i.e.*, putting actigraph on  
178 before bedtime on the first day and removing it after getting up on the last day). Yet sickness and  
179 vacation of participants as well as device failure prevented the full 11-day recording in some cases (n  
180 = 10 at 3 mo, n = 28 at 6 mo, n = 28 at 12 mo). Further, in some instances the recording period was  
181 extended beyond the 11 days (e.g. because the original device was temporarily lost or parents  
182 recorded longer, n = 27 at 3 mo, n = 23 at 6 mo, n = 15 at 12 mo). Therefore, recordings with available  
183 data for both actigraphy and 24-h-diary lasted on average  $10.76 \pm 1.72$  days:  $11.13 \pm 1.17$  days at 3 mo,  
184  $10.60 \pm 1.91$  at 6 mo and  $10.55 \pm 1.93$  at 12 mo. Additionally, single days were excluded if infants were  
185 either sick (except for common cold symptoms), or if the actigraph was removed for a longer time  
186 duration or if the fit between actigraphy-based data and 24-h-diary was poor (see Table A1).

#### 187 2.4.3 Calculation of sleep variables

188 To capture the multitude of dimensions of infants' sleep, we calculated 48 sleep variables of  
189 interest, based on previous definitions [22,27,33] (Table 1). 3 valid recording days of actimetry were



190 set as minimum to compute sleep variables in each participant. For variability variables a minimum  
 191 of 5 valid recording days was required. All calculated sleep variables (except variability variables  
 192 which were standard deviations across days) were averaged across all valid recorded days. After  
 193 calculating sleep variables, additional exclusions were performed: for time zone change of > 1h less  
 194 than 1 week before the recording (n = 1 at 12 mo), for medication affecting sleep (n = 2 at 3 mo) and  
 195 for medical problems (n = 1 at 6 mo, n = 2 at 12 mo) or psychological trauma was experienced (n = 1  
 196 at 12 mo).

197 Table 1. Definition and descriptive statistics at 3,6 and 12 months of the 48 infant sleep variables based  
 198 on 24-h-diary and actigraphy that entered the principal component analysis. Bedtime and Get up  
 199 Time and their variability variables are based on parent report in 24-h-diary, all other variables are  
 200 based on actigraphy (with adjustments from diaries as reported in 2.4.1). Mean  $\pm$  SD (Minimum -  
 201 Maximum)

| Variable Name                                                                                                                                                                                                                         | 3 Months                                  | 6 Months                                  | 12 Months                               |
|---------------------------------------------------------------------------------------------------------------------------------------------------------------------------------------------------------------------------------------|-------------------------------------------|-------------------------------------------|-----------------------------------------|
| (1) <i>Bedtime</i> (clock time in min)<br>Parent-reported time in the 24-h-diary of putting the child to bed. For missing values, the first minute of reported sleep was used. If bedtime exceeded midnight 1440 was added.           | 1273.71 $\pm$ 75.38<br>(1116 - 1479)      | 1226.59 $\pm$ 69.18<br>(1105 - 1420.8)    | 1220.78 $\pm$ 53.46<br>(1120 - 1416)    |
| (2) <i>Variability of Bedtime</i> (SD)<br>Standard deviation of <i>Bedtime</i> across recording days                                                                                                                                  | 43.5 $\pm$ 21.64<br>(0 - 118.39)          | 32.6 $\pm$ 17.76<br>(0 - 87.13)           | 28.88 $\pm$ 16.83<br>(3.35 - 91.41)     |
| (3) <i>Get up Time</i> (clock time in min)<br>Parent reported time in the 24-h-diary of getting out of bed in the morning. For missing values, the last minute of reported sleep was used.                                            | 472.88 $\pm$ 52.06<br>(361.5 - 612)       | 443.84 $\pm$ 48.89<br>(335.5 - 577.7)     | 437.93 $\pm$ 43.41<br>(323.33 - 625)    |
| (4) <i>Variability of Get up Time</i> (SD)<br>Standard deviation of <i>Get up Time</i> across recording days                                                                                                                          | 42.02 $\pm$ 16.44<br>(6.35 - 96.17)       | 36.35 $\pm$ 16.26<br>(0 - 109.2)          | 35.8 $\pm$ 16.93<br>(6.12 - 99.82)      |
| (5) <i>Sleep Onset</i> (clock time in min)<br>Following <i>Bedtime</i> , the first minute asleep of at least 10 minutes of consecutive sleep. If asleep at <i>Bedtime</i> , the first minute asleep before <i>Bedtime</i> was chosen. | 1257.94 $\pm$ 68.08<br>(1127.17 - 1473.3) | 1228.59 $\pm$ 65.87<br>(1112.33 - 1449.4) | 1228.74 $\pm$ 54.7<br>(1125.5 - 1423.6) |
| (6) <i>Variability of Sleep Onset</i> (SD)<br>Standard deviation of <i>Sleep Onset</i> across recording days                                                                                                                          | 51.87 $\pm$ 23.83<br>(7.75 - 157.33)      | 37.79 $\pm$ 19.07<br>(6.33 - 109.24)      | 34.28 $\pm$ 17.2<br>(4.7 - 79.86)       |
| (7) <i>Sleep Latency</i> (min)<br>Duration in minutes between <i>Bedtime</i> and <i>Sleep Onset</i> , set to 0 if <i>Sleep Onset</i> is before <i>Bedtime</i>                                                                         | 7.79 $\pm$ 7.97<br>(0 - 42)               | 11.29 $\pm$ 8.3<br>(0 - 45.5)             | 10.94 $\pm$ 8.2<br>(0 - 38.38)          |
| (8) <i>Variability of Sleep Latency</i> (SD)<br>Standard deviation of <i>Sleep Latency</i> across recording days                                                                                                                      | 10.29 $\pm$ 9.17<br>(0 - 56.64)           | 11.43 $\pm$ 7.61<br>(0 - 44.91)           | 10.26 $\pm$ 7.14<br>(0 - 40.27)         |
| (9) <i>Sleep Offset</i> (clock time in min)<br>Last minute asleep of at least 10 consecutive minutes asleep before <i>Get up Time</i> or if asleep at <i>Get up Time</i> last minute asleep after <i>Get up Time</i>                  | 470.93 $\pm$ 53.13<br>(354.8 - 622.86)    | 437.71 $\pm$ 49.41<br>(324.5 - 583.38)    | 437.96 $\pm$ 46.6<br>(316.67 - 615.5)   |
| (10) <i>Variability of Sleep Offset</i> (SD)<br>Standard deviation of <i>Sleep Offset</i> across recording days                                                                                                                       | 48.06 $\pm$ 18.51<br>(15.82 - 114.17)     | 39.74 $\pm$ 16.89<br>(16.51 - 123.17)     | 38.66 $\pm$ 20.5<br>(12.02 - 164.83)    |
| (11) <i>Midsleep</i> (clock time in min)<br>Midpoint between <i>Sleep Onset</i> and <i>Sleep Offset</i>                                                                                                                               | 143.93 $\pm$ 53.02<br>(32.65 - 298.7)     | 112.88 $\pm$ 51.71<br>(13.7 - 293.81)     | 114.03 $\pm$ 46.09<br>(13.5 - 278.2)    |
| (12) <i>Variability of Midsleep</i> (SD)<br>Standard Deviation of <i>Midsleep</i> across recording days                                                                                                                               | 37.62 $\pm$ 13.62<br>(11.95 - 78.54)      | 28.37 $\pm$ 11.24<br>(8.86 - 64.22)       | 27.33 $\pm$ 13.46<br>(7.7 - 101.79)     |
| (13) <i>Sleep Opportunity</i> (min)<br>Time between <i>Bedtime</i> and <i>Get Up Time</i> (unless asleep at either of these times, in which case <i>Sleep Onset/Sleep Offset</i> was used)                                            | 662.46 $\pm$ 62.8<br>(494.2 - 840)        | 670.89 $\pm$ 54.38<br>(558.11 - 820.67)   | 666.4 $\pm$ 42.51<br>(578 - 738)        |
| (14) <i>Variability of Sleep Opportunity</i> (SD)<br>Standard deviation of <i>Sleep Opportunity</i> across recording days                                                                                                             | 62.85 $\pm$ 23.14<br>(16.83 - 124.55)     | 47.29 $\pm$ 20.18<br>(12.31 - 129.93)     | 45.32 $\pm$ 23.34<br>(14.51 - 163.62)   |

|                                                                                                                                                              |                                     |                                     |                                      |
|--------------------------------------------------------------------------------------------------------------------------------------------------------------|-------------------------------------|-------------------------------------|--------------------------------------|
| (15) <i>Sleep Period</i> (min)<br>Time between <i>Sleep Onset</i> and <i>Sleep Offset</i>                                                                    | 651.87 ± 58.05<br>(488.9 - 796)     | 651.52 ± 50.44<br>(543.56 - 821.78) | 650.94 ± 44.7<br>(547 - 735.75)      |
| (16) <i>Variability of Sleep Period</i> (SD)                                                                                                                 | 67.09 ± 22.21<br>(21.19 - 127.12)   | 51.83 ± 21.73<br>(16.36 - 144.75)   | 49.85 ± 23.43<br>(11.27 - 163.32)    |
| (17) <i>Total Sleep Time</i> (min)<br>Minutes scored 'Sleep' within <i>Sleep Period</i>                                                                      | 573.63 ± 58.25<br>(421.33 - 709.44) | 605.23 ± 47.38<br>(492.44 - 728.75) | 627.3 ± 51.29<br>(488.5 - 717.1)     |
| (18) <i>Variability of Total Sleep Time</i> (SD)<br>Standard deviation of <i>Total Sleep Time</i> across recording days                                      | 53.47 ± 18.91<br>(18.62 - 108.3)    | 45.98 ± 16.04<br>(10.15 - 91.2)     | 46.33 ± 19.44<br>(11.61 - 140.08)    |
| (19) <i>Sleep Efficiency</i> (%)<br>( <i>Total Sleep Time</i> )/( <i>Sleep Opportunity</i> ) * 100                                                           | 87.83 ± 5.4<br>(69.37 - 99.5)       | 90.67 ± 4.08<br>(80.55 - 99.21)     | 94.25 ± 3.52<br>(84.06 - 99.64)      |
| (20) <i>Variability of Sleep Efficiency</i> (SD)<br>Standard deviation of <i>Sleep Efficiency</i> across recording days                                      | 5.46 ± 2.35<br>(1.84 - 18.22)       | 4.59 ± 1.95<br>(1.57 - 11.97)       | 3.57 ± 1.9<br>(0.45 - 12.94)         |
| (21) <i>Wake after Sleep Onset</i> (min)<br>Minutes scored 'Wake' in <i>Sleep Period</i>                                                                     | 69.04 ± 32.15<br>(13.7 - 197.75)    | 44.73 ± 24.55<br>(1.86 - 121.17)    | 22.31 ± 17.02<br>(0 - 78.22)         |
| (22) <i>Variability of Wake after Sleep Onset</i> (SD)<br>Standard deviation of <i>Wake after Sleep Onset</i> across recording days                          | 32.72 ± 12.52<br>(11.3 - 79.02)     | 26.63 ± 13.46<br>(4.26 - 86.03)     | 18.8 ± 10.68<br>(1.9 - 57.17)        |
| (23) <i>Longest Nocturnal Wake</i> (min)<br>Longest period scored 'Wake' followed by at least 15 mins scored 'Sleep' in <i>Sleep Period</i>                  | 31.87 ± 14.5<br>(7.6 - 93.33)       | 24.37 ± 13.19<br>(1.86 - 75.89)     | 13.74 ± 9.65<br>(0 - 56.67)          |
| (24) <i>Variability of Longest Nocturnal Wake</i> (SD)<br>Standard deviation of <i>Longest Nocturnal Wake</i> across recording days                          | 16.43 ± 7.32<br>(3.1 - 39.7)        | 17.09 ± 10.2<br>(3.14 - 48.35)      | 12.04 ± 8.78<br>(0 - 60.19)          |
| (25) <i>Nocturnal Wake Frequency per Hour</i><br>(wakings/hour)<br>(Number of Nocturnal Wake Periods in <i>Sleep Period</i> )/ <i>Sleep Period</i>           | 0.34 ± 0.11<br>(0.1 - 0.61)         | 0.23 ± 0.1<br>(0.02 - 0.49)         | 0.14 ± 0.09<br>(0 - 0.46)            |
| (26) <i>Variability of Nocturnal Wake Frequency per Hour</i><br>(SD)<br>Standard deviation of <i>Nocturnal Wake Frequency per Hour</i> across recording days | 0.12 ± 0.04<br>(0.03 - 0.27)        | 0.11 ± 0.04<br>(0.03 - 0.22)        | 0.1 ± 0.04<br>(0 - 0.24)             |
| (27) <i>Variability of Activity level</i> (SD)<br>Standard deviation of activity per minute in <i>Sleep Period</i>                                           | 168.64 ± 61.51<br>(40.69 - 356.73)  | 178.91 ± 79.21<br>(49.92 - 478.14)  | 108.5 ± 50.86<br>(33.64 - 336.46)    |
| (28) <i>Percent Active Epochs</i> (ratio)<br>(Minutes of epochs with non-zero activity in <i>Sleep Period</i> )/ <i>Sleep Period</i>                         | 0.3 ± 0.05<br>(0.14 - 0.4)          | 0.24 ± 0.04<br>(0.13 - 0.34)        | 0.23 ± 0.03<br>(0.14 - 0.32)         |
| (29) <i>Variability Percent Active Epochs</i> (SD)<br>Standard deviation of <i>Percent Active Epochs</i> across recording days                               | 0.04 ± 0.01<br>(0.02 - 0.09)        | 0.04 ± 0.02<br>(0.01 - 0.1)         | 0.04 ± 0.01<br>(0.01 - 0.12)         |
| (30) <i>Longest Sleep</i> (min)<br>Longest continuous period scored as 'Sleep'                                                                               | 292.19 ± 90.16<br>(139 - 580.29)    | 339.21 ± 99.18<br>(158.75 - 632.17) | 458.24 ± 126.82<br>(166.89 - 706.44) |
| (31) <i>Variability of Longest Sleep</i> (SD)<br>Standard deviation of <i>Longest Sleep</i> across recording days                                            | 82.75 ± 36.25<br>(21.04 - 190.74)   | 104.82 ± 39.39<br>(23.02 - 222.59)  | 127.41 ± 50.7<br>(14.21 - 245.62)    |
| (32) <i>Longest Wake</i> (min)<br>Longest continuous period scored as 'Wake'                                                                                 | 162.44 ± 27.74<br>(101.11 - 292.29) | 212.13 ± 32.94<br>(139.33 - 348)    | 293.14 ± 40.25<br>(195.33 - 402)     |
| (33) <i>Variability of Longest Wake</i> (SD)<br>Standard deviation of <i>Longest Wake</i> across recording days                                              | 40.07 ± 18<br>(11.65 - 111.57)      | 50.11 ± 22.36<br>(9.07 - 109.98)    | 65.91 ± 22.99<br>(18.63 - 150.2)     |
| (34) <i>Nap Counter</i><br>Number of daytime sleep periods exceeding 20 minutes between <i>Sleep Offset</i> and <i>Sleep Onset</i>                           | 4.06 ± 0.77<br>(2 - 6.25)           | 3.2 ± 0.59<br>(1.38 - 4.56)         | 2.07 ± 0.55<br>(0.67 - 3.57)         |
| (35) <i>Variability Nap counter</i> (SD)<br>Standard deviation of <i>Nap counter</i> across recording days                                                   | 1.1 ± 0.31<br>(0.38 - 2.32)         | 0.84 ± 0.3<br>(0 - 1.72)            | 0.74 ± 0.27<br>(0 - 1.9)             |
| (36) <i>Sleep after Wake Onset</i> (min)<br>Minutes scored Sleep between <i>Sleep Offset</i> and <i>Sleep Onset</i>                                          | 247.56 ± 53.3<br>(123 - 382.88)     | 179.03 ± 37.26<br>(95.6 - 298.43)   | 142.54 ± 38.17<br>(70.5 - 282.63)    |

|                                                                                                                                                                                                                                                                                                          |                                     |                                     |                                     |
|----------------------------------------------------------------------------------------------------------------------------------------------------------------------------------------------------------------------------------------------------------------------------------------------------------|-------------------------------------|-------------------------------------|-------------------------------------|
| (37) <i>Variability Sleep after Wake Onset (SD)</i><br>Standard deviation of <i>Sleep after Wake Onset</i> across recording days                                                                                                                                                                         | 61.92 ± 20.6<br>(19.22 - 154.89)    | 45.27 ± 16.89<br>(15.49 - 112.18)   | 43.76 ± 17.8<br>(10.94 - 140.06)    |
| (38) <i>Sleep Duration 24 h (min)</i><br>Minutes scored 'Sleep' across 24 h                                                                                                                                                                                                                              | 822.19 ± 55.68<br>(672.86 - 975.44) | 783.15 ± 44.45<br>(654 - 922.33)    | 767.64 ± 45.34<br>(609.67 - 867.43) |
| (39) <i>Variability of Sleep Duration 24 h (SD)</i><br>Standard deviation of <i>Sleep Duration 24 h</i> across recording days                                                                                                                                                                            | 66.34 ± 19.58<br>(28.03 - 123.61)   | 58.77 ± 19.91<br>(24.73 - 121.56)   | 54.17 ± 18.89<br>(20.77 - 127.09)   |
| (40) <i>Sleep Duration Day (min)</i><br>Minutes scored 'Sleep' between 7 am and 7 pm                                                                                                                                                                                                                     | 278.59 ± 44.98<br>(158.7 - 396)     | 203.46 ± 39.66<br>(115.88 - 345.13) | 165.83 ± 41.31<br>(81.33 - 298.56)  |
| (41) <i>Variability Sleep Duration Day (SD)</i><br>Standard deviation of <i>Sleep Duration Day</i> across recording days                                                                                                                                                                                 | 53.42 ± 16.05<br>(17.33 - 125.21)   | 43.44 ± 14.42<br>(15.79 - 83.25)    | 43.2 ± 12.34<br>(21.21 - 76.36)     |
| (42) <i>Sleep Duration Night (min)</i><br>Minutes scored 'Sleep' between 7 pm and 7 am                                                                                                                                                                                                                   | 548.43 ± 45.54<br>(407.22 - 644.44) | 579.11 ± 49.17<br>(426.75 - 672.11) | 602.1 ± 47.78<br>(467.89 - 699.11)  |
| (43) <i>Variability of Sleep Duration Night (SD)</i><br>Standard deviation of <i>Sleep Duration Night</i> across recording days                                                                                                                                                                          | 44.78 ± 16.37<br>(12.78 - 92.5)     | 40.95 ± 14.53<br>(12.34 - 103.61)   | 35.51 ± 13.72<br>(7.31 - 72.05)     |
| (44) <i>% Sleep Duration Night (ratio)</i><br><i>(Sleep Duration Night) / (Sleep Duration 24h)</i>                                                                                                                                                                                                       | 0.67 ± 0.05<br>(0.55 - 0.84)        | 0.74 ± 0.05<br>(0.57 - 0.85)        | 0.78 ± 0.05<br>(0.61 - 0.88)        |
| (45) <i>Variability % Sleep Duration Night (SD)</i><br>Standard deviation of <i>% Sleep Duration Night</i> across recording days                                                                                                                                                                         | 0.05 ± 0.01<br>(0.02 - 0.09)        | 0.05 ± 0.01<br>(0.02 - 0.11)        | 0.05 ± 0.01<br>(0.02 - 0.1)         |
| (46) <i>Sleep Regularity Index Whole Day (ratio)</i><br>The probability of being in the same state (Sleep or Wake) computed for each minute, averaged across one day, and then across all recording days. Represented with ratio (0-1) ('Sleep'/'Wake), where 1 reflects the exact same rhythm every day | 0.77 ± 0.03<br>(0.66 - 0.84)        | 0.82 ± 0.03<br>(0.74 - 0.89)        | 0.87 ± 0.03<br>(0.76 - 0.95)        |
| (47) <i>Sleep Regularity Index Day (ratio)</i><br><i>Sleep Regularity Index</i> for the clock times from 7 am and 7 pm                                                                                                                                                                                   | 0.7 ± 0.04<br>(0.62 - 0.86)         | 0.76 ± 0.04<br>(0.64 - 0.91)        | 0.81 ± 0.04<br>(0.7 - 0.92)         |
| (48) <i>Sleep Regularity Index Night (ratio)</i><br><i>Sleep Regularity Index</i> for the clock times from 7 pm and 7 am                                                                                                                                                                                 | 0.84 ± 0.05<br>(0.66 - 0.96)        | 0.88 ± 0.05<br>(0.62 - 0.97)        | 0.92 ± 0.04<br>(0.79 - 0.99)        |

202

#### 203 2.4.4 Data Imputation

204 Subsequent analyses were done in R (version 3.5.0) [34] and R studio (version 1.1.463) [35], with  
 205 several packages for data handling (*tidyr*, *eeptools*, *reshape*, *dplyr*, *lubridate*, *phyloseq*, *VIM*, *margrittr*,  
 206 *chron*, *kableExtra*, *knitr*, *qwraps2*) and plotting (*corrplot*, *ggplot2*, *lattice*, *ggfortify*, *sjPlot*, *cowplot*) [36–53].  
 207 Missing and excluded data was imputed using multiple imputation in the *mice* package [54] and  
 208 additional functions from *miceadds*, *MKmisc* and *micemd* package [55–57]. Missing data ranged from  
 209 0% to 22.32% per variable. The dataset used for imputation included all sleep variables and several  
 210 demographic variables (see Appendix A). All numerical variables were predicted using the method  
 211 “2l.pmm”, using the participant ID as grouping variable and assessment age (3/6/12 months) as slope.  
 212 Binary variables were predicted using the method “logreg” and categorical variables were predicted  
 213 using either “polyreg” or “polyr”. Two-level structure was not included in binary and categorical  
 214 variable prediction. 100 imputations were run with 100 iterations each using 5 cores (20 imputations  
 215 per core). Data quality of the imputations were visually controlled with density plots (observed vs.  
 216 imputed values) and line plots for convergence of the iterations. The reported method and prediction  
 217 matrix were chosen due to best fit of the density plot.

218

#### 219 2.4.5 Sleep Composites

220 We used an integrative and data-driven approach to congregate the 48 infant sleep variables  
 221 (such as *Total Sleep Time*, see Table 1 for full description) to the core composite scores, inspired by an  
 222 approach in young children [58]. We applied a principal component analysis (PCA) with *promax*

223 rotation (*psych* package [59]) across all participants and all assessment timepoints. Because we  
 224 included more variables than Staples et al., we examined the best solution with scree and parallel  
 225 plots as well as the interpretability of the resulting composites. Therefore, we ended up choosing a 5-  
 226 component solution. We removed single sleep variables with absolute factor loadings below 0.512 as  
 227 recommended for sample sizes exceeding 100 [60]. This led to the exclusion of 14 variables (see Table  
 228 2). Additionally, we excluded *Sleep Duration 24 h* (min, minutes scored ‘Sleep’ across 24 hours) for  
 229 interpretability (details below). In total, 33 variables were included in the final PCA solution, with 3  
 230 to 10 single sleep variables assigned to each sleep composite (Table 2).

231 Each subsequent model was run with all 100 imputations of the PCA-derived scores for each  
 232 participant and sleep composite (unweighted average of the highest loadings). All results were  
 233 pooled across all 100 models. To evaluate effects of age and sex we used linear regression models.  
 234 With the *corrplot* package we examined correlations between sleep composites and assessment time  
 235 points using Spearman correlation coefficients. Bonferroni correction was applied to address multiple  
 236 comparison issues. To test the stability of effects across development, the range of each infant’s  
 237 percentiles across all assessment timepoints was evaluated (within-subject stability). The stability of  
 238 composites vs single variables was evaluated using paired t-tests.

239 Associations of sleep composites with behavioral outcomes were identified based on  
 240 longitudinal multilevel models using the *lme4* package and by including participant ID for the  
 241 intercepts and timepoint as slope. Covariates were exact age and sex, and predictors were the 5 sleep  
 242 composites. Values were considered outliers if they exceeded 1.5 times the interquartile range below  
 243 the 1st quartile or above the 3<sup>rd</sup> quartile. Reported statistics include outliers, but any changes in  
 244 significance due to exclusions of outliers are mentioned specifically. Significance level was set to  
 245 below 0.05.

246  
 247 Table 2. Single sleep variables and PCA solution with oblique rotation (promax rotation). The  
 248 numbers in parentheses link the single sleep variables to their explanation in Table 1. Values in bold  
 249 indicate the strongest loading. 14 variables were excluded due to low loading (< 0.512) on any of the  
 250 sleep composites. These were (7) *Sleep Latency* (min), (8) *Variability of Sleep Latency* (SD), (20) *Variability*  
 251 *of Sleep Efficiency*, (26) *Variability of Nocturnal Wake Frequency per Hour* (SD), (29) *Variability Percent*  
 252 *Active Epochs* (SD), (31) *Variability of Longest Sleep* (SD), (35) *Variability Nap counter* (SD), (37) *Variability*  
 253 *Sleep after Wake Onset* (SD), (39) *Variability of Sleep Duration 24 h* (SD), (41) *Variability Sleep Duration*  
 254 *Day* (SD), (42) *Sleep Duration Night* (min), (43) *Variability of Sleep Duration Night* (SD), (45) *Variability*  
 255 *% Sleep Duration Night* (SD), (46) *Sleep Regularity Index Whole Day* (Ratio).  
 256

| Variables                                                       | Sleep Activity | Sleep Variability | Sleep Day | Sleep Timing | Sleep Night |
|-----------------------------------------------------------------|----------------|-------------------|-----------|--------------|-------------|
| (19) <i>Sleep Efficiency</i> (%)                                | <b>-0.89</b>   | 0.05              | 0.00      | -0.01        | -0.02       |
| (23) <i>Longest Nocturnal Wake</i> (min)                        | <b>0.88</b>    | 0.04              | 0.05      | 0.02         | 0.19        |
| (21) <i>Wake after Sleep Onset</i> (min)                        | <b>0.86</b>    | -0.01             | -0.11     | 0.00         | 0.16        |
| (25) <i>Nocturnal Wake Frequency per Hour</i><br>(wakings/hour) | <b>0.79</b>    | -0.13             | -0.14     | 0.03         | -0.13       |
| (30) <i>Longest Sleep</i> (min)                                 | <b>-0.77</b>   | 0.09              | 0.04      | -0.03        | 0.15        |
| (27) <i>Variability of Activity level</i> (SD)                  | <b>0.76</b>    | -0.05             | 0.10      | 0.01         | 0.02        |
| (22) <i>Variability of Wake after Sleep Onset</i><br>(SD)       | <b>0.72</b>    | 0.09              | 0.10      | 0.01         | 0.05        |
| (24) <i>Variability of Longest Nocturnal Wake</i><br>(SD)       | <b>0.70</b>    | 0.07              | 0.28      | -0.05        | 0.02        |
| (48) <i>Sleep Regularity Index Night</i> (ratio)                | <b>-0.69</b>   | -0.18             | 0.17      | 0.04         | 0.09        |
| (28) <i>Percent Active Epochs</i> (ratio)                       | <b>0.58</b>    | -0.08             | -0.28     | 0.01         | 0.12        |
| (14) <i>Variability of Sleep Opportunity</i> (SD)               | -0.05          | <b>0.87</b>       | -0.07     | -0.08        | 0.04        |
| (16) <i>Variability of Sleep Period</i> (SD)                    | 0.04           | <b>0.86</b>       | 0.03      | -0.11        | -0.07       |
| (18) <i>Variability of Total Sleep Time</i> (SD)                | -0.06          | <b>0.73</b>       | 0.10      | 0.00         | 0.00        |



|                                                |             |             |              |             |             |
|------------------------------------------------|-------------|-------------|--------------|-------------|-------------|
| (10) <i>Variability of Sleep Offset</i> (SD)   | -0.09       | <b>0.73</b> | -0.05        | 0.02        | 0.11        |
| (12) <i>Variability of Midsleep</i> (SD)       | 0.00        | <b>0.73</b> | -0.08        | -0.01       | -0.05       |
| (4) <i>Variability of Get up Time</i> (SD)     | -0.13       | <b>0.72</b> | 0.02         | 0.14        | 0.19        |
| (6) <i>Variability of Sleep Onset</i> (SD)     | 0.10        | <b>0.64</b> | -0.04        | 0.06        | -0.10       |
| (2) <i>Variability of Bedtime</i> (SD)         | 0.20        | <b>0.58</b> | 0.05         | -0.02       | -0.11       |
| (32) <i>Longest Wake</i> (min)                 | -0.10       | 0.04        | <b>-0.92</b> | 0.11        | -0.17       |
| (34) <i>Nap Counter</i>                        | 0.03        | -0.06       | <b>0.86</b>  | -0.12       | -0.14       |
| (36) <i>Sleep after Wake Onset</i> (min)       | 0.00        | 0.01        | <b>0.82</b>  | -0.11       | -0.26       |
| (47) <i>Sleep Regularity Index Day</i> (ratio) | -0.02       | -0.24       | <b>-0.76</b> | 0.07        | -0.02       |
| (40) <i>Sleep Duration Day</i> (min)           | -0.01       | 0.11        | <b>0.72</b>  | 0.32        | 0.05        |
| (33) <i>Variability of Longest Wake</i> (SD)   | 0.06        | 0.12        | <b>-0.68</b> | 0.03        | -0.21       |
| (44) <i>% Sleep Duration Night</i> (ratio)     | -0.12       | -0.05       | <b>-0.56</b> | -0.39       | 0.12        |
| (9) <i>Sleep Offset</i> (clock time in min)    | 0.03        | -0.01       | 0.03         | <b>1.01</b> | 0.32        |
| (3) <i>Get up Time</i> (clock time in min)     | 0.08        | -0.03       | 0.01         | <b>0.97</b> | 0.37        |
| (11) <i>Midsleep</i> (clock time in min)       | -0.02       | -0.01       | 0.08         | <b>0.93</b> | -0.18       |
| (5) <i>Sleep Onset</i> (clock time in min)     | -0.05       | -0.04       | 0.08         | <b>0.76</b> | -0.52       |
| (1) <i>Bedtime</i> (clock time in min)         | -0.07       | 0.00        | -0.04        | <b>0.68</b> | -0.49       |
| (15) <i>Sleep Period</i> (min)                 | 0.11        | 0.03        | -0.01        | 0.12        | <b>0.99</b> |
| (13) <i>Sleep Opportunity</i> (min)            | 0.18        | 0.00        | 0.05         | 0.08        | <b>0.96</b> |
| (17) <i>Total Sleep Time</i> (min)             | -0.40       | -0.03       | 0.04         | 0.06        | <b>0.78</b> |
| Proportion of Variance explained               | <b>0.19</b> | <b>0.14</b> | <b>0.14</b>  | <b>0.13</b> | <b>0.11</b> |

257  
258

### 259 3. Results

#### 260 3.1 Five principal components express all infant sleep variables: infant sleep composites

261 We achieved reduction of complexity of infant sleep variables by determining 5 core sleep  
262 composites. The relationship of each of the 48 original sleep variables with the sleep composites is  
263 represented as “loadings” (Table 2). The five sleep composites explain a total of 71% of the variances,  
264 which yields a diagonal fit of 0.98. This revealed:

- 265 • *Sleep Activity* – Larger values generally reflect more movements and more awakenings during  
266 the night as well as less regularity of awakenings. The most representative (i.e. with highest  
267 loading) single variable were *Sleep Efficiency* (negative) or *Longest Nocturnal Wake* (positive).
- 268 • *Sleep Timing* – Increased values generally reflect later clock time of bed times and sleep times. The  
269 most representative single variable was *Sleep Offset*.
- 270 • *Sleep Night* – Larger values indicate longer nighttime sleep opportunity and longer nighttime  
271 sleep duration. The most representative single variable was *Sleep Period*.
- 272 • *Sleep Day* – Larger values refer to longer daytime sleep duration, more daytime naps, and lower  
273 regularity in daytime sleep. The most representative variables were *Longest Wake* (negatively) or  
274 *Nap Counter* (positively).
- 275 • *Sleep Variability* – Larger values identify increased variability from day-to-day (standard  
276 deviation) within *Sleep Timing* and *Sleep Night*. The most representative single variable was  
277 *Variability of Sleep Opportunity*.

278 Interestingly *24 h Sleep Duration* showed the highest loading on the *Sleep Day* composite, meaning it  
279 was more related to *Sleep Day* than *Sleep Night*. This finding supports particularly the tight link

280 between naps and total sleep duration. However, to make the interpretation of the *Sleep Day*  
281 composite easier, we removed this variable from subsequent analyses.

### 282 3.2 *Sleep composites accurately reflect sleep maturation across infancy*

283 To ensure that the sleep composites accurately reflect the maturation of sleep patterns in infancy, we  
284 examined changes in the sleep composites across age. As expected, *Sleep Activity*, *Sleep Day*, *Sleep*  
285 *Timing* and *Sleep Variability* all decreased with age (*Sleep Activity*  $t_{(434.25)} = -14.59$ ,  $p < 0.001$ , *Sleep Day*  
286  $t_{(413.53)} = -25.09$ ,  $p < 0.001$ , *Sleep Timing*  $t_{(426.65)} = -5.78$ ,  $p < 0.001$ , *Sleep Variability*  $t_{(423.45)} = -6.13$ ,  $p < 0.001$ ).  
287 In other words, in comparison to younger age, older infants showed lower activity at night and woke  
288 up less frequently ( $b = -0.15$  per month older), slept less often and also shorter during the day ( $b = -$   
289  $0.21$ ), went to sleep earlier at night and woke up earlier in the morning ( $b = -0.07$ ) and were more  
290 consistent in their sleep timing and nighttime sleep duration ( $b = -0.08$ ). *Sleep Night* on the other hand,  
291 slightly increased with age ( $t_{(421.30)} = 2.59$ ,  $p = 0.01$ ), indicating that older infants slept more at night ( $b$   
292  $= 0.03$ ). Therefore, sleep composites capture the sleep maturation in infancy well. Moreover, within  
293 the same models we could observe sex differences, specifically in *Sleep Activity* (female vs male  $t_{(431.04)}$   
294  $= -3.84$ ,  $p < 0.001$ ) and *Sleep Variability* ( $t_{(434.79)} = -1.88$ ,  $p = 0.06$ ), yet the latter was significant only after  
295 exclusion of outliers ( $t_{(413.77)} = -2.21$ ,  $p = 0.03$ ). Girls showed lower nightly activity and reduced wakings  
296 ( $b = -0.29$  for female) and were more consistent in their sleep routine (with outliers  $b = -0.17$ / without  
297 outliers  $b = -0.19$  for female). No sex differences were detected in the other sleep composites ( $p > 0.05$ ).

### 298 3.3 *Strong correlations between the sleep composites*

299 Next, we investigated the interrelationships between the sleep composites. Notably, each sleep  
300 composite correlated significantly with all other sleep composites, indicating that while sleep is a  
301 multidimensional construct, the different dimensions are tightly intertwined (all  $p < 0.001$ ; Figure 1).  
302 Interestingly, the strongest positive correlation was found between *Sleep Activity* and *Sleep Day* ( $r_s =$   
303  $0.50$ ,  $p < 0.001$ ). Higher activity at night was associated with more sleep during the day. Surprisingly,  
304 this association was stronger than the association of *Sleep Activity* and *Sleep Night*. As expected, a  
305 strong positive correlation was found between *Sleep Timing* and *Sleep Variability* ( $r_s = 0.48$ ,  $p < 0.001$ ),  
306 i.e. the later the sleep timing, the higher the *Sleep Variability*. The strongest negative correlations were  
307 found between *Sleep Day* and *Sleep Night* ( $r_s = -0.26$ ,  $p < 0.001$ ) with infants that slept more during the  
308 day sleeping less at night. A strong negative association was also found for *Sleep Night* with *Sleep*  
309 *Timing* ( $r_s = -0.25$ ,  $p < 0.001$ ), such that infants with later sleep times had less nighttime sleep. In sum,  
310 even though the approach clearly identified 5 core sleep composite of infant sleep, those composites  
311 are also highly interrelated with each other.

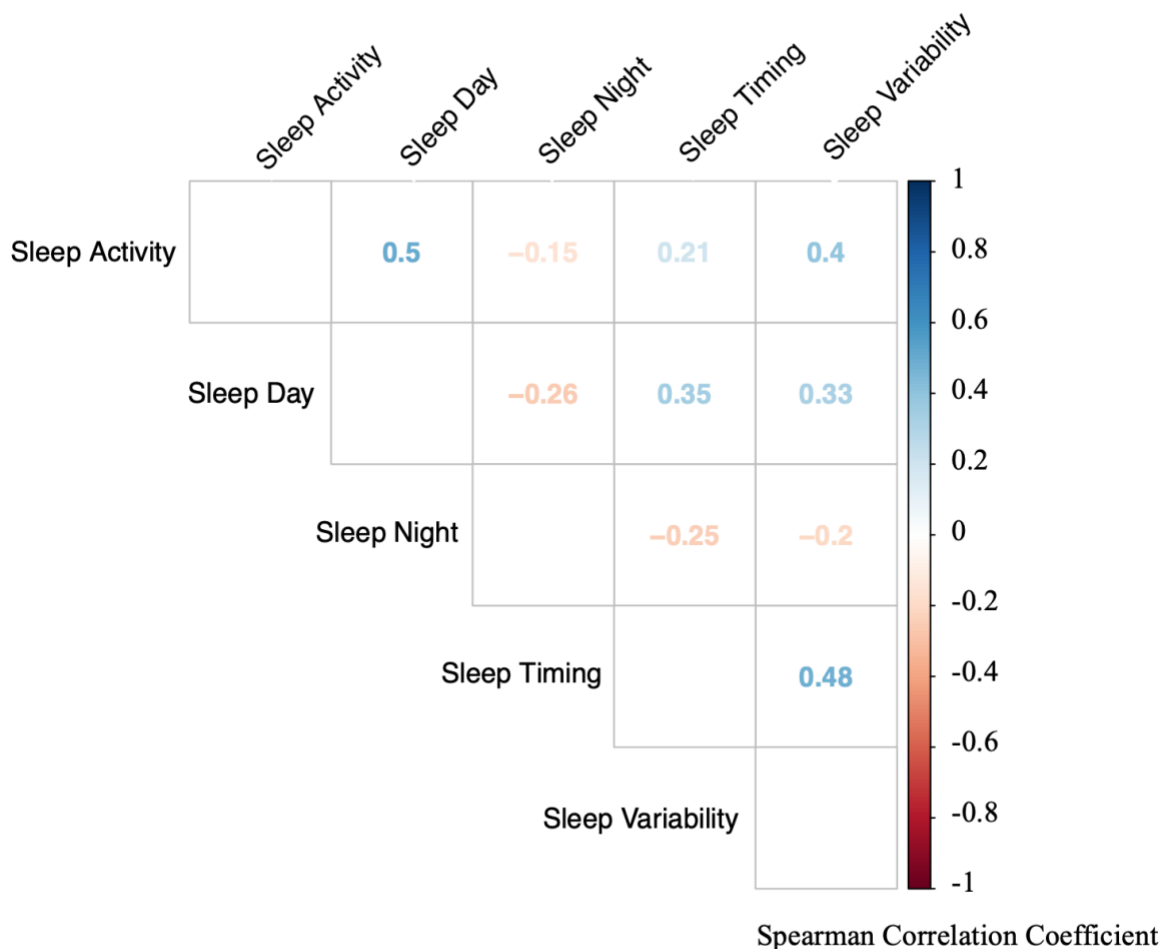

312

313 **Figure 1.** Correlations between the infant sleep composites based on all assessment timepoints. Each  
 314 sleep composite is significantly associated with all other composites (all  $p < 0.001$ ). Colors indicate  
 315 strength of correlation (red = negative correlations, blue = positive correlations). Numbers indicate  
 316 spearman correlation coefficient ( $r_s$ ).

### 317 3.3 Stability of sleep composites

318 To investigate the stability of sleep composites across the first infant year, we examined correlation  
 319 coefficients between all assessment time points of each sleep composite (Table 3). Most sleep composites  
 320 significantly correlated between the adjacent time points (3 vs. 6 or 6 vs. 12 months). Only *Sleep Timing* was  
 321 also significantly correlated between 3 and 12 months. While *Sleep Variability* and *Sleep Night* were  
 322 significantly correlated when outliers were removed, this correlation was low, suggesting no stability ( $R^2 =$   
 323  $0.07$ ). To understand the dynamics, we calculated the within-subject stability, *i.e.* consistency of the position  
 324 of each subject in relation to all other participants. On average children had a maximum change of 29% for  
 325 *Sleep Timing*, 38% for *Sleep Night*, 43% for *Sleep Variability* and *Sleep Day* and 45% for *Sleep Activity* from 3 –  
 326 12 months (values from one imputation). This suggests that although most sleep behaviors are stable in the  
 327 short term, they are dynamic across the first year of infancy.

328

329

330 Table 3. Spearman Correlation Coefficients ( $r_s$ ) of Sleep Composites across assessment time points.  
 331 Significant correlations are presented in bold (Bonferroni corrected p-value below 0.0033). The correlation  
 332 marked with \* are significant upon exclusion of outliers: *Sleep Variability*  $r_s = 0.26$ ,  $p = 0.002$ , *Sleep Night*  $r_s =$   
 333  $0.26$ ,  $p = 0.001$ ). Composites are most stable across adjacent time points, but only *Sleep Timing* is stable across  
 334 the entire first year.

| Sleep Composite   | Correlation 3 vs. 6 Months |                   | Correlation 6 vs. 12 Months |                   | Correlation 3 vs. 12 Months |                   |
|-------------------|----------------------------|-------------------|-----------------------------|-------------------|-----------------------------|-------------------|
|                   | $r_s$                      | p                 | $r_s$                       | p                 | $r_s$                       | p                 |
| Sleep Activity    | <b>0.29</b>                | <b>&lt; 0.001</b> | 0.21                        | 0.01              | 0.15                        | 0.07              |
| Sleep Day         | 0.25                       | 0.004             | <b>0.29</b>                 | <b>&lt; 0.001</b> | 0.11                        | 0.21              |
| Sleep Night       | <b>0.53</b>                | <b>&lt; 0.001</b> | <b>0.45</b>                 | <b>&lt; 0.001</b> | 0.24*                       | 0.004             |
| Sleep Timing      | <b>0.68</b>                | <b>&lt; 0.001</b> | <b>0.58</b>                 | <b>&lt; 0.001</b> | <b>0.55</b>                 | <b>&lt; 0.001</b> |
| Sleep Variability | <b>0.28</b>                | <b>&lt; 0.001</b> | <b>0.38</b>                 | <b>&lt; 0.001</b> | 0.23*                       | 0.007             |

335

### 336 3.4 Stability of sleep composites vs single sleep variables

337 Subsequently we tested whether the sleep composites were more stable across the assessment timepoints  
 338 compared to the stability of single sleep variables, as observed in young children and adults [27]. We used  
 339 the within-subject stability and compared it between single and composite variables. We tested this within-  
 340 subject stability in *Sleep Timing* (the most stable variable) and in *Sleep Activity*, (the least stable variable).  
 341 Within-subject stability was also computed for the single sleep variables that loaded the highest and lowest  
 342 on both sleep composites: *Sleep Offset* and *Bedtime* as well as *Longest Nocturnal Wake* and *Percent Active*  
 343 *Epochs*. An exemplary comparison of one imputation and 6 random participants is shown in Figure 2. There  
 344 was no significant difference between the within-subject stability of *Sleep Activity* and *Longest Nocturnal*  
 345 *Wake* ( $t_{(115.69)} = -0.17$ ,  $p = 0.86$ ) nor between the within-subject stability of *Sleep Activity* and *Percent Active*  
 346 *Epochs* ( $t_{(134.03)} = 0.10$ ,  $p = 0.92$ ), indicating no advantage in within-subject stability in the sleep composite as  
 347 compared to within-subject stability in single sleep variables. In other words, infants showed variable sleep  
 348 behavior no matter how it was quantified. Similarly, there was no significant difference between the within-  
 349 subject stability of *Sleep Timing* and *Bedtime* ( $t_{(124.88)} = 0.40$ ,  $p = 0.69$ ). Contrastingly, *Sleep Timing* showed  
 350 higher within-subject stability as compared to *Sleep Offset* ( $t_{(106.64)} = 3.20$ ,  $p = 0.002$ ). Thus, overall, we cannot  
 351 confirm higher within-subject stability across the first year of life in sleep composites versus within-subject  
 352 stability in single sleep variables.



353

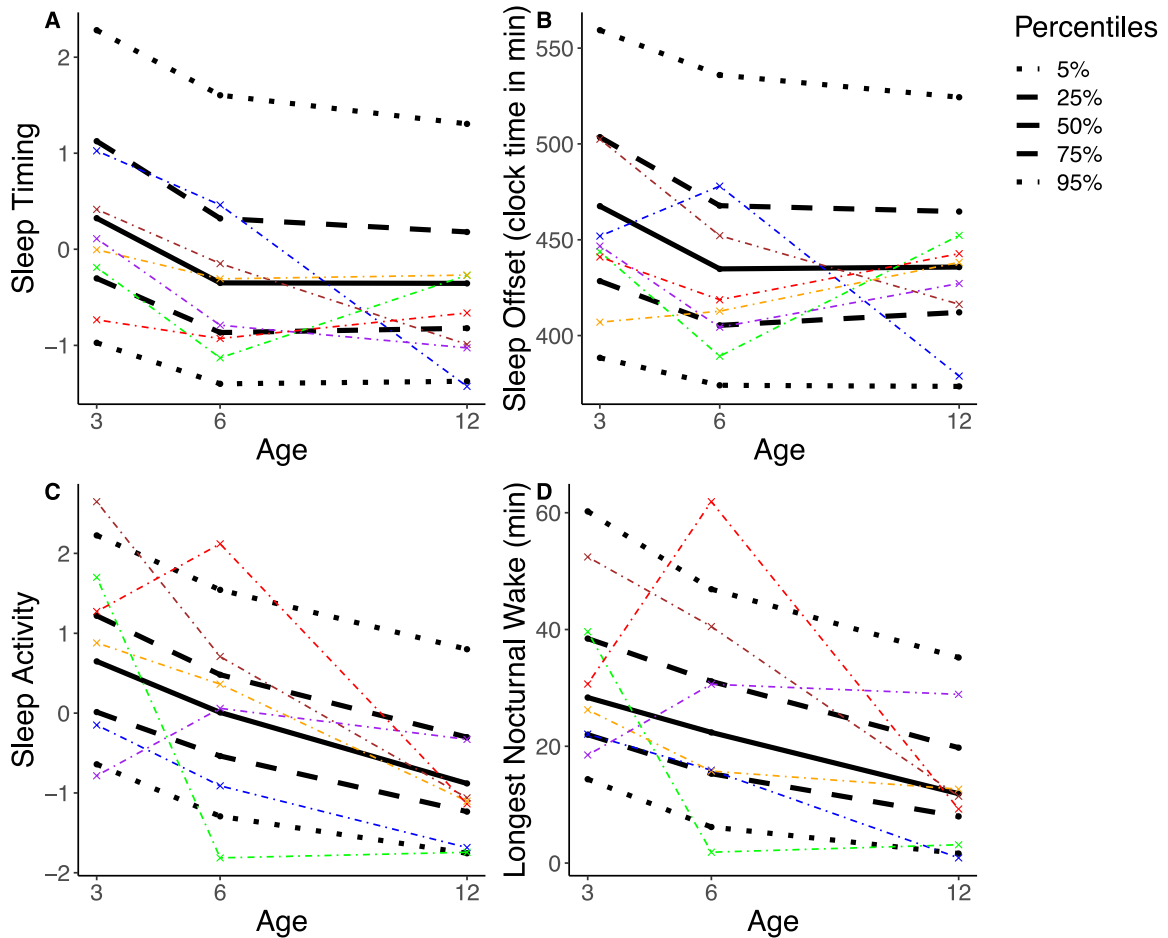

354

355 **Figure 2.** The percentile distribution of two sleep composites (*Sleep Timing*, *Sleep Activity*) and their  
356 highest loading single variable (*Sleep Offset* or *Longest Nocturnal Wake*) is illustrated based on one  
357 randomly selected imputation (black; solid line = median, dashed line = interquartile range, dotted  
358 line = 90<sup>th</sup> percentile). 6 randomly selected participants are represented each with specific color.  
359 Results illustrate that the position of a participant within the percentile distribution fluctuates across  
360 the assessments of 3, 6 and 12 mo. In other words, e.g. an infant with a comparatively high score on  
361 *Sleep Activity* at 3 mo does not necessarily maintain a high score in *Sleep Activity* at 6 and 12 mo.

362

### 363 3.5 Association of Sleep Composite with Behavioral Development

364 Lastly, we evaluated whether infant sleep composites are linked to behavioral developmental status.  
365 Multilevel models across all assessment timepoints revealed a negative link between *Sleep Day* and ASQ-  
366 *Collective* score ( $b = -6.65$ ,  $t_{(344.65)} = -2.22$ ,  $p = 0.03$ ). No association was observed between behavioral  
367 development and the other sleep composites ( $p > 0.05$ , Table 4). The effect between *Sleep Day* and *Collective*  
368 *Score* was more pronounced after reducing the model to only include *Sleep Day* and control variables (Exact  
369 age, sex) and no other sleep composites ( $b = -7.88$ ,  $t_{(358.69)} = -2.83$ ,  $p = 0.005$ ). This association suggests that  
370 infants with more daytime sleep had lower overall developmental scores. To investigate this finding in  
371 more depth we determined whether the effects persisted in the two behavioral sub-scores *Personal-social*  
372 and *Gross Motor*. This was not the case - no significant effects between the behavioral sub-scores and any  
373 of the sleep composites were found ( $p > 0.05$ ). It is thus likely that the effect of *Sleep Day* with behavioral  
374 developmental is driven by the combination over multiple scales of development.

375  
376  
377

Table 4. Associations between sleep composites and behavioral development as quantified by the Ages and stages questionnaire. Bold font indicates significant associations ( $p < 0.05$ ). SE = Standard error of measurement.

| Variable                 | <i>Collective Score</i> |                | <i>Personal-social</i> |         | <i>Gross Motor</i> |
|--------------------------|-------------------------|----------------|------------------------|---------|--------------------|
|                          | b ± SE                  | p              | b ± SE                 | p       | b ± SE             |
| Intercept                | 203.16 ±<br>6.58        | <<br>0.00<br>1 | 42.1<br>7 ±<br>2.04    | < 0.001 | 38.82 ±<br>2.21    |
| <i>Sleep Activity</i>    | -0.91 ±<br>2.27         | 0.69           | -0.46<br>±<br>0.73     | 0.53    | 1.05 ±<br>0.80     |
| <i>Sleep Day</i>         | <b>-6.65 ±<br/>3.00</b> | <b>0.03</b>    | -1.08<br>±<br>0.98     | 0.27    | 1.12 ±<br>1.10     |
| <i>Sleep Night</i>       | 0.84 ±<br>2.08          | 0.68           | 0.49<br>±<br>0.62      | 0.43    | 0.68 ±<br>0.69     |
| <i>Sleep Timing</i>      | -0.20 ±<br>2.41         | 0.94           | -0.40<br>±<br>0.70     | 0.57    | 0.47 ±<br>0.78     |
| <i>Sleep Variability</i> | -2.52 ±<br>2.09         | 0.23           | 0.33<br>±<br>0.67      | 0.62    | 0.55 ±<br>0.77     |
| Exact age                | 0.21 ±<br>0.79          | 0.78           | -0.37<br>±<br>0.27     | 0.17    | 0.14 ±<br>0.30     |
| Female sex               | 9.49 ±<br>5.63          | 0.09           | 1.76<br>±<br>1.35      | 0.19    | 0.90 ±<br>1.55     |

378  
379  
380  
381  
382

#### 383 4. Discussion

384 In this study we demonstrate that numerous dimensions of infant sleep can be reduced to the five  
385 core sleep composites *Sleep Activity*, *Sleep Timing*, *Sleep Day*, *Sleep Night* and *Sleep Variability*. The sleep  
386 composites undergo developmental changes that align with the known maturation of sleep  
387 behaviors. We thus recommend the use of sleep composites to reduce variables and to streamline  
388 analyses between different lines of research.

389 Furthermore, both the majority of sleep composites, as well as the single sleep variables, show only  
390 limited within-subject stability across the first year of infancy, which contrasts with reports on older  
391 children. The only notable exception is *Sleep Timing*, which is stable across the first year of life, and  
392 indicates either a parental or infant preference. The lack of within-subject stability can be problematic  
393 for studies with a single assessment time-point, because results will vary depending on the  
394 assessment time-point. We thus recommend to use multiple assessment time points, especially when  
395 the early sleep behavior is used to predict later cognitive or behavioral outcomes. Interestingly, *Sleep*  
396 *Day* is associated with behavioral developmental scores, therefore being a potential marker for  
397 maturation. Additionally, we report a sex difference in *Sleep Activity*, with male participants showing  
398 more and longer awakenings during the night compared to female infants.

399 We confirm for the first time the existence of the five infant sleep composites *Sleep Activity*, *Sleep*  
400 *Timing*, *Sleep Day*, *Sleep Night* and *Sleep Variability*, as previously identified in 2.5-3.5 year-old children  
401 [27] and which correspond to the most fundamental dimensions of sleep regulation. We adhered to  
402 the same terminology used by Staples et al., except for replacing *Sleep Duration* with *Sleep Night* to  
403 differentiate it from *Sleep Day*. To represent sleep in the earliest period of life, we included several  
404 variables pertaining to daytime sleep (e.g. number of naps, longest duration of consolidated wake).  
405 This confirmed *Sleep Day* as a construct separate from the other sleep composites. 14 single sleep  
406 variables were excluded from the sleep composites due to low loadings on any of the composites.  
407 This included several of the variability variables, as well as *Sleep Latency* which Staples et al. also  
408 reported to separate from the other composites. In comparison to Staples et al. our method explains  
409 sleep variable variance to a slightly lower extent (71% vs 82%), which might be caused by the  
410 difference in the assessed sleep variables or the different age range (33 vs 18). Importantly, the  
411 proposed sleep composites follow the primary developmental trajectories of the single sleep variables  
412 [17,61]. Overall, we conclude that composite sleep dimensions computed from underlying sleep  
413 variables are consistent from infancy to childhood and correspond well to the known core maturation  
414 of infant sleep patterns.

415 The selection of variables can be difficult because of the diversity of sleep variables and computations.  
416 Using too many variables can lead to multiple testing problems and increase false positive findings  
417 [26]. Thus, using composites to reduce the number of variables facilitates investigations in multi-  
418 dimensional research. Our results demonstrate that the resulting sleep composites remain consistent  
419 across early development, which aligns with Staples et al., even though different sleep variables were  
420 used for computations and even though actigraphy devices differed (GENEActive in our study,  
421 MicroMini Motionlogger used by Staples et al.). Our analysis confirms that all single sleep variables  
422 identical to Staples et al., [27] loaded onto the same sleep composite. This strongly supports the use  
423 of sleep composites, which has the additional advantage to enhance comparability across studies.  
424 Moreover, when computation of sleep composites is not possible, our results can guide the selection  
425 of variables. Specifically, single sleep variables with high loading are most comparable to the  
426 corresponding sleep composites and therefore preferable.

427 While sleep composites showed some stability across adjacent time periods (3-6 and 6-12 months),  
428 the majority of sleep composites did not maintain strong stability across the longest period from 3 to  
429 12 months (except for *Sleep Timing*). This aligns with a previous report, which examined stability of  
430 sleep behaviors from 3 to 42 months [11] and found more stability in sleep duration across shorter  
431 time intervals while sleep onset time was very stable. Compared to children, adolescents and adults,

432 the stability of sleep variables is exceptionally low in infants. In children 3-7 years old the year-to-  
433 year stability was moderate ( $r = 0.4 - 0.6$ ) in variables related to *Sleep Night* and *Sleep Timing* (even  
434 though low stability was noted in *Sleep Activity*) [62]. Thus, the stability of *Sleep Night* increases until  
435 childhood, while *Sleep Timing* remains stable and *Sleep Activity* remains variable until adolescence. A  
436 10-year-long study examining dynamics of sleep duration based on interviews from ages 1 to 10 years  
437 reported annual fluctuations, yet overall long-term stability [63]. In adults, year-to-year correlation is  
438 high for most sleep measures, especially when derived from several nights ( $r = 0.48 - 0.93$ ) [64–67].  
439 While in older children the instability of sleep behaviors might be due to measurement imprecisions  
440 and therefore is improved by using composites (shown by Staples et al.), it seems that the instability  
441 of sleep behaviors in infancy is inherent in the behavior itself. This is in agreement with the  
442 observation that parent-reported infant sleep problems are usually not persistent across longer time  
443 periods [68]. Hence, because variability in infant sleep persists naturally, infant sleep composites are  
444 not eliminating this variability. One solution to address this point, specifically when examining later  
445 outcomes, is to perform a repeated-measures design, as has been previously suggested by Ednick et  
446 al. [69]. If this is not possible, it is important to clarify the ages a finding relates to.

447 The high within-infant stability of *Sleep Timing* is notable and we assume that it is largely parent-  
448 driven. This is confirmed by the finding that parent's bedtimes are positively correlated with *Sleep*  
449 *Timing* (Mother  $r_s = 0.33$ ,  $p < 0.001$  Father  $r_s = 0.24$ ,  $p < 0.001$ ; exploratory analysis using the reported  
450 bedtimes in the Pittsburgh Sleep Quality index). Not surprisingly, parents with later bedtimes also  
451 have infants with later sleep timing. However, interestingly, parental bedtimes are not a significant  
452 factor in a model that includes within-subject stability of infants to predict infant *Sleep Timing* (Mother  
453  $F_{(1,75156.98)} = 2.96$ ,  $p = 0.09$ , partial  $\eta^2 = 0.01$ , Father  $F_{(1,60885.42)} = 2.84$ ,  $p = 0.09$ , partial  $\eta^2 = 0.01$ , participant  
454 ID  $F = 3.33$ ,  $p < 0.001$ , partial  $\eta^2 = 0.69$ ). Therefore, variance in infant's sleep remains unexplained by  
455 parent's bedtime preferences. It is unclear, whether this variance relates to other parental factors (e.g.  
456 cognitions about regular timing of infant sleep), or if the infants themselves already start to  
457 demonstrate daytime preference as an early form of infant chronotype.

458 Intriguingly, we found a difference in *Sleep Activity* between male and female infants. This is both  
459 surprising - because most previous studies in infants reported no sex differences [11,70,71] - and  
460 unsurprising - because these differences are well known in adults [72–74]. Boys commonly show  
461 higher activity levels [75], which could cause more activity during sleep in infant boys. However, one  
462 study reported sex differences as young as age 2 weeks in electroencephalographic recordings [76].  
463 Therefore, with methods that are sufficiently sensitive, sex differences in sleep behaviors can be  
464 detected already very early in life.

465 A final study goal was to examine if any of the sleep composites mirrors behavioral maturation. Thus,  
466 we tested the association between sleep composites and behavioral developmental status. Indeed,  
467 infants with more daytime sleep (*Sleep Day*) had lower ASQ-*Collective scores*. Our results align with  
468 Spruyt et al. who report a negative association between daytime sleep at 12 months with emotional  
469 regulation and behavioral maturation [77]. Of relevance might be that the variable *Sleep Day* shows  
470 the largest developmental changes across the first year of life. For example, hours asleep during the  
471 day and amount of naps are reduced by half from 3 to 12 months of age. Furthermore, the  
472 neurophysiology of daytime sleep also changes with age: 5-year old children show decreased slow  
473 wave activity (a marker of sleep need) during an afternoon nap compared to 2 and 3-year old children  
474 [10], which also suggests that daytime sleep specifically reflects maturation of the central nervous  
475 system. When infants are young, napping is important for new memory formation [5,78,79]. When  
476 infants get older, their tolerance of longer wake periods increases, which likely also includes their  
477 capacity of information acquisition without an immediate nap. Therefore, we hypothesize that a  
478 faster decrease in daytime sleep reflects more advanced maturation on a neuronal level. Kurdziel et  
479 al. support this theory by demonstrating that naps enhance memory performance in pre-school  
480 children only in those children who habitually nap [80] (but see [81]). Therefore, children likely stop



481 to take regular naps when they have developed a physiological tolerance to longer wake periods and  
482 when they can retain information without a subsequent nap.

483 We included a comprehensive list of commonly used sleep variables of infants and young children.  
484 Because the structuring of factors in the principle component analysis depends on the variables used,  
485 the sleep composites identified in this study might not be representative for other investigations that  
486 include different single sleep variables. Furthermore, the choice of 5 factors for the PCA was based  
487 on both, data driven criteria, as well as on the interpretability of the resulting sleep composites. It is  
488 therefore possible that from a data-driven perspective, more factors would result in a better model  
489 fit. However, we prioritized the interpretability of composites so that infant sleep composites can be  
490 used for analysis with other datasets. Further, our data is biased towards a higher parental education  
491 level (data not shown) and is therefore more homogenous than the general population.

## 492 5. Conclusions

493 Our five sleep composites accurately characterize the complex dimensions of infant sleep and reflect  
494 known maturational dynamics of infant sleep. To increase comparison across studies, we suggest  
495 that researchers use infant sleep composites or, if not possible, single sleep variables with high  
496 loadings on the sleep composite of interest. As infant sleep behavior is highly variable both between  
497 and within infants, we recommend to use multiple assessment time points, especially for testing sleep  
498 behaviors as predictors for later cognitive, emotional or behavioral outcomes. Two exciting future  
499 directions of research will likely target *Sleep Timing* as a possible early chronotype and *Sleep Day* as a  
500 maturational marker. Therefore, this study opens up new possibilities to standardize and advance  
501 the emerging field of infant sleep research.

502 **Author Contributions:** Conceptualization, S.F.S., S.K., R.H. and M.K.; methodology, S.F.S., S.K., R.H. and M.K.;  
503 software, S.F.S.; formal analysis, S.F.S.; investigation, S.F.S., S.K.; resources, S.K., R.H. and M.K.; data curation,  
504 S.F.S.; writing—original draft preparation, S.F.S.; writing—review and editing, S.F.S., S.K., R.H. and M.K.;  
505 visualization, S.F.S.; supervision, S.K.; project administration, S.F.S.; funding acquisition, S.K., S.F.S., R.H.

506 **Funding:** This research was funded by the University of Zurich (Clinical Research Priority Program “Sleep and  
507 Health”, Forschungskredit FK-18-047, Faculty of Medicine), the Swiss National Science Foundation (PCEFP1-  
508 181279, P0ZHP1-178697), Foundation for Research in Science and the Humanities (STWF-17-008), and the Olga  
509 Mayenfisch Stiftung.

510 **Acknowledgments:** We thank the parents and infants for participating in our study. We would like to thank the  
511 students and interns of the Baby Sleep laboratory for their help with data collection: Sina Boschert-Hennrich,  
512 Rita Grolimund, Viktoria Gastens, Lara Barblan, Rahel Nicolet, Melanie Auer, Monika Stoller and Juliane Berger.  
513 Additionally, we thank Andjela Markovic, Christophe Mühlematter, Matthieu Beaugrand and Valeria Jaramillo  
514 for reviewing code and general discussion and feedback.

515 **Conflicts of Interest:** The authors declare no conflict of interest. MK declares to have received advisory fees from  
516 Bayer, GSK, Novartis, Astra, Boehringer Ingelheim and Mundipharma outside the submitted work. MK is also  
517 board member of the Deep Breath Initiative (DBI), a company that specializes and provides services in the field  
518 of exhaled breath analysis. RH is partner of Tosoo AG, a company developing wearables for sleep  
519 electrophysiology monitoring and stimulation.

520

521

522

523

524 **Appendix A**

525

526 The imputation data set included the participant number (complete), the timepoint of  
527 assessment (complete), gender (complete), exact age at assessment (complete or set to assessment  
528 timepoint for data points to impute), *Collective Score* (4.5% missing), *Gross Motor* (4.5 % missing) and  
529 *Personal Social* (4.5% missing) scores from the Ages and Stages questionnaire [82], gestation age at  
530 birth (complete), sleep environment for the baby at night (own room, parent’s room, room shared  
531 with sibling; complete for missing data we inferred from the other assessment time points), number  
532 of children in family (complete), analysis run for gut microbiota (complete, if there was not gut  
533 microbiota data, the run at which the data would have been analyzed was used), probiotics use  
534 (yes/no) at 3 (5.2 % missing) and 6 months (3% missing), antibiotics use at 6 (3% missing) and 12  
535 months (6.7% missing, “never”, “unknown time”, “2-4 weeks before assessment”, “< 2 weeks before  
536 assessment”), 3 alpha diversity measures for the gut microbiota (Shannon, Observed, Chao all 4.1%  
537 missing), gut microbiota cluster (4.1% missing), gut microbiota age prediction (4.1% missing),  
538 education mother (0.2% missing) and father (2.8% missing, “none”, “apprenticeship”, “high school”,  
539 “university”, “PhD”), bottle and breastfeeding frequency (4.9% missing, 0 for never or rarely  
540 breastfed, 1 if breastfed occasionally, regularly or daily). All 48 sleep variables were included, which  
541 ranged from 4.9% missing (*Bedtime*) to 22.3% missing (*Variability of Total Sleep Time*, *Variability of Sleep*  
542 *Efficiency*, *Variability of Sleep after Wake Onset*). The missing data from each variable was predicted by  
543 all other variables in the dataset that correlated with the variable with  $r \geq 0.1$ . The parental education  
544 and bottle and breastfeeding frequency variables had to be excluded as predictors because inclusion  
545 of them lead to inability to specify the model (see prediction matrix in the supplementary table A2).  
546

547

## 548 References

549

- 550 1. Iglowstein, I.; Jenni, O.G.; Molinari, L.; Largo, R.H. Sleep Duration From Infancy to  
551 Adolescence: Reference Values and Generational Trends. *PEDIATRICS* **2003**, *111*,  
552 302–307, doi:10.1542/peds.111.2.302.
- 553 2. Kurth, S.; Ringli, M.; Geiger, A.; LeBourgeois, M.; Jenni, O.G.; Huber, R. Mapping of  
554 cortical activity in the first two decades of life: a high-density sleep  
555 electroencephalogram study. *J. Neurosci.* **2010**, *30*, 13211–13219.
- 556 3. Feinberg, I.; Campbell, I.G. Sleep EEG changes during adolescence: An index of a  
557 fundamental brain reorganization. *Brain Cogn.* **2010**, *72*, 56–65,  
558 doi:10.1016/j.bandc.2009.09.008.
- 559 4. Cao, J.; Herman, A.B.; West, G.B.; Poe, G.; Savage, V.M. Unraveling Why We Sleep:  
560 Quantitative Analysis Reveals Abrupt Transition from Neural Reorganization to Repair  
561 in Early Development. *bioRxiv* **2019**, 827212, doi:10.1101/827212.
- 562 5. Friedrich, M.; Mölle, M.; Friederici, A.D.; Born, J. Sleep-dependent memory  
563 consolidation in infants protects new episodic memories from existing semantic  
564 memories. *Nat. Commun.* **2020**, *11*, 1298, doi:10.1038/s41467-020-14850-8.
- 565 6. Peiffer, A.; Bricchet, M.; De Tiège, X.; Peigneux, P.; Urbain, C. The power of children’s  
566 sleep - Improved declarative memory consolidation in children compared with adults.  
567 *Sci. Rep.* **2020**, *10*, 9979, doi:10.1038/s41598-020-66880-3.
- 568 7. El-Sheikh, M.; Sadeh, A. I. Sleep and Development: Introduction to the Monograph.  
569 *Monogr. Soc. Res. Child Dev.* **2015**, *80*, 1–14, doi:10.1111/mono.12141.

- 570 8. Lam, P.; Hiscock, H.; Wake, M. Outcomes of Infant Sleep Problems: A Longitudinal  
571 Study of Sleep, Behavior, and Maternal Well-Being. *Pediatrics* **2003**, *111*, e203–e207,  
572 doi:10.1542/peds.111.3.e203.
- 573 9. Martin, J.; Hiscock, H.; Hardy, P.; Davey, B.; Wake, M. Adverse Associations of Infant  
574 and Child Sleep Problems and Parent Health: An Australian Population Study.  
575 *Pediatrics* **2007**, *119*, 947–955, doi:10.1542/peds.2006-2569.
- 576 10. Kurth, S.; Lassonde, J.M.; Pierpoint, L.A.; Rusterholz, T.; Jenni, O.G.; McClain, I.J.;  
577 Achermann, P.; LeBourgeois, M.K. Development of nap neurophysiology: preliminary  
578 insights into sleep regulation in early childhood. *J. Sleep Res.* **2016**, *25*, 646–654,  
579 doi:10.1111/jsr.12427.
- 580 11. Scher, A.; Epstein, R.; Tirosh, E. Stability and changes in sleep regulation: A  
581 longitudinal study from 3 months to 3 years. *Int. J. Behav. Dev.* **2004**, *28*, 268–274,  
582 doi:10.1080/01650250344000505.
- 583 12. Galland, B.C.; Taylor, B.J.; Elder, D.E.; Herbison, P. Normal sleep patterns in infants  
584 and children: A systematic review of observational studies. *Sleep Med. Rev.* **2012**, *16*,  
585 213–222, doi:10.1016/j.smrv.2011.06.001.
- 586 13. Louis, J.; Zhang, J.X.; Revol, M.; Debilly, G.; Challamel, M.J. Ontogenesis of nocturnal  
587 organization of sleep spindles: a longitudinal study during the first 6 months of life.  
588 *Electroencephalogr. Clin. Neurophysiol.* **1992**, *83*, 289–296, doi:10.1016/0013-  
589 4694(92)90088-Y.
- 590 14. Jenni, O.G.; Borbély, A.A.; Achermann, P. Development of the nocturnal sleep  
591 electroencephalogram in human infants. *Am. J. Physiol.-Regul. Integr. Comp. Physiol.*  
592 **2004**, *286*, R528–R538, doi:10.1152/ajpregu.00503.2003.
- 593 15. Parmelee, A.H. Sleep Patterns in Infancy A Study of One Infant from Birth to Eight  
594 Months of Age. *Acta Paediatr.* **1961**, *50*, 160–170, doi:10.1111/j.1651-  
595 2227.1961.tb08035.x.
- 596 16. Sadeh, A.; Lavie, P.; Scher, A.; Tirosh, E.; Epstein, R. Actigraphic home-monitoring  
597 sleep-disturbed and control infants and young children: a new method for pediatric  
598 assessment of sleep-wake patterns. *Pediatrics* **1991**, *87*, 494–499.
- 599 17. Anders, T.F.; Keener, M. Developmental Course of Nighttime Sleep-Wake Patterns in  
600 Full-Term and Premature Infants During the First Year of Life. I. *Sleep* **1985**, *8*, 173–  
601 192, doi:10.1093/sleep/8.3.173.
- 602 18. Hagne, I. Development of the Sleep EEG in Normal Infants During the First Year of  
603 Life. *Acta Paediatr.* **1972**, *61*, 25–53, doi:10.1111/j.1651-2227.1972.tb08271.x.
- 604 19. Sadeh, A. Iii. Sleep Assessment Methods. *Monogr. Soc. Res. Child Dev.* **2015**, *80*, 33–  
605 48, doi:10.1111/mono.12143.
- 606 20. Camerota, M.; Tully, K.P.; Grimes, M.; Gueron-Sela, N.; Propper, C.B. Assessment of  
607 infant sleep: how well do multiple methods compare? *Sleep* **2018**, *41*,  
608 doi:10.1093/sleep/zsy146.
- 609 21. Werner, H.; Molinari, L.; Guyer, C.; Jenni, O.G. Agreement Rates Between Actigraphy,  
610 Diary, and Questionnaire for Children’s Sleep Patterns. *Arch. Pediatr. Adolesc. Med.*  
611 **2008**, *162*, 350–358, doi:10.1001/archpedi.162.4.350.

- 612 22. Meltzer, L.J.; Montgomery-Downs, H.E.; Insana, S.P.; Walsh, C.M. Use of actigraphy  
613 for assessment in pediatric sleep research. *Sleep Med. Rev.* **2012**, *16*, 463–475,  
614 doi:10.1016/j.smrv.2011.10.002.
- 615 23. Schoch, S.F.; Kurth, S.; Werner, H. Actigraphy in sleep research with infants and young  
616 children: Current practices and future benefits of standardized reporting. *J. Sleep Res.*  
617 **2020**, *n/a*, e13134, doi:10.1111/jsr.13134.
- 618 24. Schoch, S.F.; Jenni, O.G.; Kohler, M.; Kurth, S. Actimetry in infant sleep research: an  
619 approach to facilitate comparability. *Sleep* **2019**, *42*, doi:10.1093/sleep/zsz083.
- 620 25. Alamian, A.; Wang, L.; Hall, A.M.; Pitts, M.; Ikekwere, J. Infant sleep problems and  
621 childhood overweight: Effects of three definitions of sleep problems. *Prev. Med. Rep.*  
622 **2016**, *4*, 463–468, doi:10.1016/j.pmedr.2016.08.017.
- 623 26. Shaffer, J.P. Multiple Hypothesis Testing. *Annu Rev Psychol* **1995**, *24*.
- 624 27. Staples, A.D.; Bates, J.E.; Petersen, I.T.; McQuillan, M.E.; Hoyniak, C. Measuring  
625 sleep in young children and their mothers: Identifying actigraphic sleep composites. *Int.*  
626 *J. Behav. Dev.* **2019**, *43*, 278–285, doi:10.1177/0165025419830236.
- 627 28. Squires, J.; Potter, L.; Bricker, D. *The ASQ user's guide for the Ages & Stages*  
628 *Questionnaires: A parent-completed, child-monitoring system*; The ASQ user's guide  
629 for the Ages & Stages Questionnaires: A parent-completed, child-monitoring system;  
630 Paul H Brookes Publishing: Baltimore, MD, US, 1995; pp. xvi, 156; ISBN 978-1-  
631 55766-179-1.
- 632 29. Gollenberg, A.L.; Lynch, C.D.; Jackson, L.W.; McGuinness, B.M.; Msall, M.E.  
633 Concurrent validity of the parent-completed Ages and Stages Questionnaires, 2nd Ed.  
634 with the Bayley Scales of Infant Development II in a low-risk sample. *Child Care*  
635 *Health Dev.* **2010**, *36*, 485–490, doi:10.1111/j.1365-2214.2009.01041.x.
- 636 30. Valla, L.; Wentzel-Larsen, T.; Hofoss, D.; Slinning, K. Prevalence of suspected  
637 developmental delays in early infancy: results from a regional population-based  
638 longitudinal study. *BMC Pediatr.* **2015**, *15*, 215, doi:10.1186/s12887-015-0528-z.
- 639 31. te Lindert, B.H.W.; Van Someren, E.J.W. Sleep Estimates Using  
640 Microelectromechanical Systems (MEMS). *Sleep* **2013**, *36*, 781–789,  
641 doi:10.5665/sleep.2648.
- 642 32. Sadeh, A.; Acebo, C.; Seifer, R.; Aytur, S.; Carskadon, M.A. Activity-based assessment  
643 of sleep-wake patterns during the 1st year of life. *Infant Behav. Dev.* **1995**, *18*, 329–  
644 337, doi:10.1016/0163-6383(95)90021-7.
- 645 33. Phillips, A.J.; Clerx, W.M.; O'Brien, C.S.; Sano, A.; Barger, L.K.; Picard, R.W.;  
646 Lockley, S.W.; Klerman, E.B.; Czeisler, C.A. Irregular sleep/wake patterns are  
647 associated with poorer academic performance and delayed circadian and sleep/wake  
648 timing. *Sci. Rep.* **2017**, *7*, 1–13.
- 649 34. R Core Team, Rf. *R: A language and environment for statistical computing*; R  
650 foundation for statistical computing Vienna, Austria, 2013;
- 651 35. Team, Rs. RStudio: integrated development for R. *RStudio Inc Boston MA URL*  
652 *Httpwww Rstudio Com* **2015**, *42*, 14.
- 653 36. Wickham, H.; Henry, L. *Tidyr: tidy messy data. R package version 1.0. 2*; 2019;



- 654 37. Wei, T.; Simko, V. R package “corrplot”: Visualization of a Correlation Matrix  
655 (Version 0.84). *Retrieved Httptgithub Comtaiyuncorrplot* **2017**.
- 656 38. Becker, J.P.; Knowles, J.E.; Knowles, M.J.E. Package ‘eepTools.’ **2020**.
- 657 39. Wickham, H. Reshaping data with the reshape package. *J. Stat. Softw.* **2007**, *21*, 1–20.
- 658 40. Wickham, H.; Francois, R.; Henry, L.; Müller, K. dplyr: A grammar of data  
659 manipulation. *R Package Version 04* **2015**, *3*.
- 660 41. Wickham, H. *ggplot2: elegant graphics for data analysis*; Springer, 2016;
- 661 42. Grolemund, G.; Wickham, H. Dates and times made easy with lubridate. *J. Stat. Softw.*  
662 **2011**, *40*, 1–25.
- 663 43. Sarkar, D. *Lattice: multivariate data visualization with R*; Springer Science & Business  
664 Media, 2008;
- 665 44. McMurdie, P.J.; Holmes, S. phyloseq: an R package for reproducible interactive  
666 analysis and graphics of microbiome census data. *PLoS One* **2013**, *8*, e61217.
- 667 45. Kowarik, A.; Templ, M. Imputation with the R Package VIM. *J. Stat. Softw.* **2016**, *74*,  
668 1–16.
- 669 46. Bache, S.M.; Wickham, H. magrittr: a forward-pipe operator for R. *R Package Version*  
670 **2014**, *1*.
- 671 47. James, D.; Hornik, K. chron: Chronological objects which can handle dates and times,  
672 2010. *URL HttptCRAN R-Proj. Orgpackage Chron R Package Version 2–3*.
- 673 48. Tang, Y.; Horikoshi, M.; Li, W. ggfortify: Unified interface to visualize statistical  
674 results of popular R packages. *R J* **2016**, *8*, 474.
- 675 49. Lüdtke, D. sjPlot: Data visualization for statistics in social science. *R Package Version*  
676 **2018**, *2*.
- 677 50. Zhu, H. KableExtra: Construct complex table with ‘kable’ and pipe syntax. *URL*  
678 *HttptCRAN R-Proj. Orgpackage KableExtra R Package Version 09 0* **2018**.
- 679 51. Wilke, C.O. *cowplot: Streamlined Plot Theme and Plot Annotations for “ggplot2”*. *R*  
680 *package version 0.9. 4*; 2019;
- 681 52. Xie, Y. knitr: A general-purpose Tool for dynamic report generation in R. *R Package*  
682 *Version* **2013**, *1*.
- 683 53. DeWitt, P. *qwraps2: Quick wraps 2*. *R package version 0.3. 0*; 2018;
- 684 54. Buuren, S. van; Groothuis-Oudshoorn, K. mice: Multivariate Imputation by Chained  
685 Equations in R. *J. Stat. Softw.* **2011**, *45*, 1–67, doi:10.18637/jss.v045.i03.
- 686 55. Robitzsch, A.; Grund, S.; Henke, T.; Robitzsch, M.A. *Package ‘miceadds’*; 2017;
- 687 56. Audigier, V.; Resche-Rigon, M. micemd: Multiple imputation by chained equations  
688 with multilevel data. *R Package Version* **2017**, *1*.
- 689 57. Kohl, M. *MKmisc: Miscellaneous functions from M. Kohl*. *R package version 0.94*;  
690 2013;
- 691 58. Staples, A.D.; Bates, J.E.; Petersen, I.T.; McQuillan, M.E.; Hoyniak, C. Measuring  
692 sleep in young children and their mothers: Identifying actigraphic sleep composites. *Int.*  
693 *J. Behav. Dev.* **2019**, *43*, 278–285, doi:10.1177/0165025419830236.
- 694 59. Revelle, W.; Revelle, M.W. Package ‘psych.’ *Compr. R Arch. Netw.* **2015**.

- 695 60. Stevens, J. *Applied multivariate statistics for the social sciences, 2nd ed*; Applied  
696 multivariate statistics for the social sciences, 2nd ed; Lawrence Erlbaum Associates,  
697 Inc: Hillsdale, NJ, US, 1992; pp. xvii, 629; ISBN 978-0-8058-1154-4.
- 698 61. Bruni Oliviero; Baumgartner Emma; Sette Stefania; Ancona Mario; Caso Gianni; Di  
699 Cosimo Maria Elisabetta; Mannini Andrea; Ometto Mariangela; Pasquini Anna; Ulliana  
700 Antonella; et al. Longitudinal Study of Sleep Behavior in Normal Infants during the  
701 First Year of Life. *J. Clin. Sleep Med.* **10**, 1119–1127, doi:10.5664/jcsm.4114.
- 702 62. Taylor, R.W.; Williams, S.M.; Farmer, V.L.; Taylor, B.J. The Stability of Sleep Patterns  
703 in Children 3 to 7 Years of Age. *J. Pediatr.* **2015**, *166*, 697-702.e1,  
704 doi:10.1016/j.jpeds.2014.11.014.
- 705 63. Jenni, O.G.; Molinari, L.; Caflisch, J.A.; Largo, R.H. Sleep Duration From Ages 1 to  
706 10 Years: Variability and Stability in Comparison With Growth. *Pediatrics* **2007**, *120*,  
707 e769–e776, doi:10.1542/peds.2006-3300.
- 708 64. Åkerstedt, T.; Kecklund, G. Stability of Day and Night Sleep-A Two-Year Follow-Up  
709 of EEG Parameters in Three-Shift Workers. *Sleep* **1991**, *14*, 507–510,  
710 doi:10.1093/sleep/14.6.507.
- 711 65. Knutson, K.L.; Rathouz, P.J.; Yan, L.L.; Liu, K.; Lauderdale, D.S. Intra-Individual  
712 Daily and Yearly Variability in Actigraphically Recorded Sleep Measures: the  
713 CARDIA Study. *Sleep* **2007**, *30*, 793–796, doi:10.1093/sleep/30.6.793.
- 714 66. Gaines, J.; Vgontzas, A.N.; Fernandez-Mendoza, J.; Basta, M.; Pejovic, S.; He, F.;  
715 Bixler, E.O. Short- and Long-Term Sleep Stability in Insomniacs and Healthy Controls.  
716 *Sleep* **2015**, *38*, 1727–1734, doi:10.5665/sleep.5152.
- 717 67. Druiven, S.J.M.; Hovenkamp-Hermelink, J.H.M.; Knapen, S.E.; Kamphuis, J.;  
718 Haarman, B.C.M.; Penninx, B.W.J.H.; Antypa, N.; Meesters, Y.; Schoevers, R.A.;  
719 Riese, H. Stability of chronotype over a 7-year follow-up period and its association with  
720 severity of depressive and anxiety symptoms. *Depress. Anxiety* **2020**, *37*, 466–474,  
721 doi:10.1002/da.22995.
- 722 68. Wake, M. Prevalence, Stability, and Outcomes of Cry-Fuss and Sleep Problems in the  
723 First 2 Years of Life: Prospective Community-Based Study. *PEDIATRICS* **2006**, *117*,  
724 836–842, doi:10.1542/peds.2005-0775.
- 725 69. Ednick, M.; Cohen, A.P.; McPhail, G.L.; Beebe, D.; Simakajornboon, N.; Amin, R.S.  
726 A Review of the Effects of Sleep During the First Year of Life on Cognitive,  
727 Psychomotor, and Temperament Development. *Sleep* **2009**, *32*, 1449–1458,  
728 doi:10.1093/sleep/32.11.1449.
- 729 70. Tikotzky, L.; Marcas, G.D.; Har-Toov, J.; Dollberg, S.; Bar-Haim, Y.; Sadeh, A. Sleep  
730 and physical growth in infants during the first 6 months. *J. Sleep Res.* **2010**, *19*, 103–  
731 110, doi:10.1111/j.1365-2869.2009.00772.x.
- 732 71. Sadeh, A.; Flint-Ofir, E.; Tirosh, T.; Tikotzky, L. Infant sleep and parental sleep-related  
733 cognitions. *J. Fam. Psychol.* **2007**, *21*, 74–87, doi:10.1037/0893-3200.21.1.74.
- 734 72. Kurina, L.M.; Thisted, R.A.; Chen, J.-H.; McClintock, M.K.; Waite, L.J.; Lauderdale,  
735 D.S. Actigraphic sleep characteristics among older Americans. *Sleep Health* **2015**, *1*,  
736 285–292, doi:10.1016/j.sleh.2015.09.004.

- 737 73. van den Berg, J.F.; Miedema, H.M.E.; Tulen, J.H.M.; Hofman, A.; Neven, A.K.;  
738 Tiemeier, H. Sex Differences in Subjective and Actigraphic Sleep Measures: A  
739 Population-Based Study of Elderly Persons. *Sleep* **2009**, *32*, 1367–1375,  
740 doi:10.1093/sleep/32.10.1367.
- 741 74. Jean-Louis, G.; Mendlowicz, M.V.; Von Gizycki, H.; Zizi, F.; Nunes, J. Assessment of  
742 Physical Activity and Sleep by Actigraphy: Examination of Gender Differences. *J.*  
743 *Womens Health Gend. Based Med.* **1999**, *8*, 1113–1117,  
744 doi:10.1089/jwh.1.1999.8.1113.
- 745 75. Campbell, D.W.; Eaton, W.O. Sex differences in the activity level of infants1. *Infant*  
746 *Child Dev.* **1999**, *8*, 1–17, doi:10.1002/(SICI)1522-7219(199903)8:1<1::AID-  
747 ICD186>3.0.CO;2-O.
- 748 76. Bach, V.; Telliez, F.; Leke, A.; Libert, J.-P. Gender-related sleep differences in neonates  
749 in thermoneutral and cool environments. *J. Sleep Res.* **2000**, *9*, 249–254,  
750 doi:10.1046/j.1365-2869.2000.00206.x.
- 751 77. Spruyt, K.; Aitken, R.J.; So, K.; Charlton, M.; Adamson, T.M.; Horne, R.S.C.  
752 Relationship between sleep/wake patterns, temperament and overall development in  
753 term infants over the first year of life. *Early Hum. Dev.* **2008**, *84*, 289–296,  
754 doi:10.1016/j.earlhumdev.2007.07.002.
- 755 78. Hupbach, A.; Gomez, R.L.; Bootzin, R.R.; Nadel, L. Nap-dependent learning in infants.  
756 *Dev. Sci.* **2009**, *12*, 1007–1012, doi:10.1111/j.1467-7687.2009.00837.x.
- 757 79. Seehagen, S.; Konrad, C.; Herbert, J.S.; Schneider, S. Timely sleep facilitates  
758 declarative memory consolidation in infants. *Proc. Natl. Acad. Sci.* **2015**, *112*, 1625–  
759 1629, doi:10.1073/pnas.1414000112.
- 760 80. Kurdziel, L.; Duclos, K.; Spencer, R.M. Sleep spindles in midday naps enhance learning  
761 in preschool children. *Proc. Natl. Acad. Sci.* **2013**, *110*, 17267–17272.
- 762 81. Lukowski, A.F.; Milojevich, H.M. Sleeping like a baby: Examining relations between  
763 habitual infant sleep, recall memory, and generalization across cues at 10 months. *Infant*  
764 *Behav. Dev.* **2013**, *36*, 369–376, doi:10.1016/j.infbeh.2013.02.001.
- 765 82. Bricker, D.; Squires, J.; Mounts, L.; Potter, L.; Nickel, R.; Twombly, E.; Farrell, J. Ages  
766 and stages questionnaire. *Paul H Brookes Baltim.* **1999**.
- 767
